# 1 **Interaction Modifications Disrupt The Structure And Stability Of Ecological Communities**

## 2 **Authors**

3 J. Christopher D. Terry\* ([james.terry@zoo.ox.ac.uk](mailto:james.terry@zoo.ox.ac.uk))<sup>1</sup>

4 Michael B. Bonsall<sup>1,2</sup>

5 Rebecca J. Morris<sup>1,3</sup>

6 <sup>1</sup> Department of Zoology, University of Oxford, OX1 3PS, UK;

7 <sup>2</sup> St. Peter's College, New Inn Hall Street, Oxford, OX1 2DL UK;

8 <sup>3</sup> Biological Sciences, Life Sciences Building 85, University of Southampton, Highfield Campus, Southampton, SO17 1BJ, UK.

## 9 **Abstract**

10 Understanding the complexity of ecological communities is a long-standing challenge. Resolutions to  
11 this problem have largely focussed on trophic interactions, despite the acknowledged importance of  
12 non-trophic effects. Trophic interaction modifications, where a consumer-resource interaction is  
13 influenced by an additional species, are a major cause of non-trophic effects that have been  
14 demonstrated to exert strong influences on the dynamics of natural systems. They offer the  
15 potential to use information about trophic interactions to understand the structure and topology of  
16 non-trophic effects. Here we examine the impact of interaction modifications, introduced under a  
17 range of assumptions, on artificial and empirical trophic networks. We show that local stability and  
18 reactivity is critically dependent on the inter-relationship between the trophic and non-trophic  
19 interactions. Depending on their distribution, interaction modifications could significantly alter the  
20 overall structure of community interactions. Analyses of the stability of ecological systems based  
21 solely on trophic interactions are therefore unreliable, making empirical distributions of interaction  
22 modifications essential.

## 23 **Introduction**

24 Understanding how large and diverse ecosystems persist is a core challenge in ecology. Theoretical  
25 expectations that large random complex systems are unlikely to be locally stable<sup>1</sup>, indicate that the  
26 interactions within ecological communities are structured in important ways<sup>2</sup>. A growing body of  
27 work has demonstrated features of trophic networks that can stabilise communities - including the  
28 distribution of weak links<sup>3,4</sup>, pairwise correlations<sup>5</sup>, modularity<sup>6</sup>, row structure<sup>7</sup> and trophic level  
29 coherence<sup>8</sup>. However, ecological communities contain complex networks of interactions beyond  
30 trophic interactions<sup>9</sup>, and there is an emerging appreciation of the value in studying the full  
31 spectrum of interaction types<sup>10-16</sup>.

32 Interaction modifications<sup>17</sup>, where a pairwise interaction is dependent on a third species, are  
33 pervasive within ecological networks<sup>18</sup> and capable of exerting impacts as strong as direct trophic  
34 interactions<sup>19</sup>. They are increasingly recognised as having the potential to be of considerable  
35 importance in the dynamics of ecological systems<sup>20-22</sup>. Interaction modifications are higher-order  
36 interactions that induce non-trophic effects (NTEs, also termed trait-mediated indirect interactions)  
37 from the modifier species onto a pair of interactors (Figure 1). This additional source of interactions  
38 and dynamic connectance introduces emergent pairwise relationships between species that do not  
39 otherwise directly interact, potentially greatly increasing the dynamic connectance of the system<sup>23</sup>.

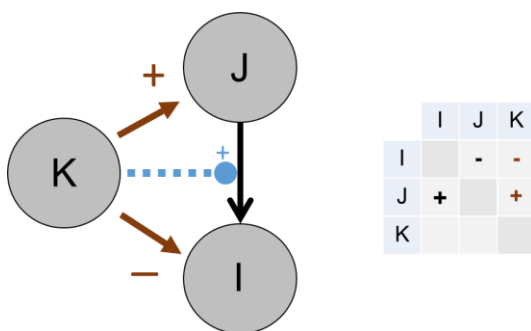

40

41 *Figure 1. Schematic representation of the relationship between a trophic interaction modification (blue dashed*  
42 *line), resultant non-trophic effects (brown solid lines) and consequent community matrix. An interaction*  
43 *modification results in two non-trophic effects from the modifier. Here a modifier acts to strengthen a trophic*  
44 *interaction. This results in a positive effect on the consumer (J) and a negative effect on the resource (I).*

45 The ubiquity and diversity of non-trophic interactions poses a considerable problem for ecologists.  
46 Previous theoretical studies have introduced independently distributed higher-order interactions  
47 and demonstrated they can have significant influence on stability<sup>24,25</sup>. However, it is known that non-  
48 trophic interactions are not randomly distributed<sup>26</sup> and it is expected that the distribution of  
49 interaction modifications (and consequent NTEs) will be structured, both internally and with respect  
50 to the underlying trophic interactions<sup>27</sup>. This relationship offers an opportunity to build upon the  
51 understanding of the structure of trophic networks<sup>28</sup> to inform the likely distribution and  
52 consequences of NTEs<sup>13</sup> and move beyond random distributions of non-trophic effects<sup>14,15</sup>.

53 Here, we examine the impact trophic interaction modifications (TIMs)<sup>29,30</sup> can have on the  
54 equilibrium dynamics of simple models of the interactions between species in artificial and empirical  
55 networks. We combine trophic interaction matrices with NTE matrices generated through distinct  
56 distributions, designed to span the range of possibilities for distributions of interaction  
57 modifications. We examine the properties of the resultant interaction matrices and test the impact  
58 on local stability and reactivity to show that the impact of interaction modifications depends  
59 crucially on their distribution and relationship with the underlying trophic network. Until the  
60 empirical distribution of interaction modifications is understood, suggested resolutions of the  
61 stability-complexity paradox are premature.

## 62 **Results**

### 63 *Introducing TIMs to artificial trophic networks*

64 We specified the interactions within artificial communities with a Jacobian matrix **A** from the  
65 combination of two matrices specifying the trophic (**B**) and non-trophic (**C**) interactions (Figure 2).  
66 Trophic interactions topologies were generated using the niche model<sup>31</sup> and parameterised with  
67 draws from a bivariate normal distribution with pairwise correlation<sup>32</sup>. We tested 16 different  
68 distribution models for the specification of non-trophic effects caused by TIMs, detailed in Table S1  
69 and depicted in Figure 3, which varied in topology, distribution of modification strengths and

70 translation from TIM to NTEs. Each of the resultant non-trophic interaction distributions had distinct  
71 structural properties, detailed in Table S2.

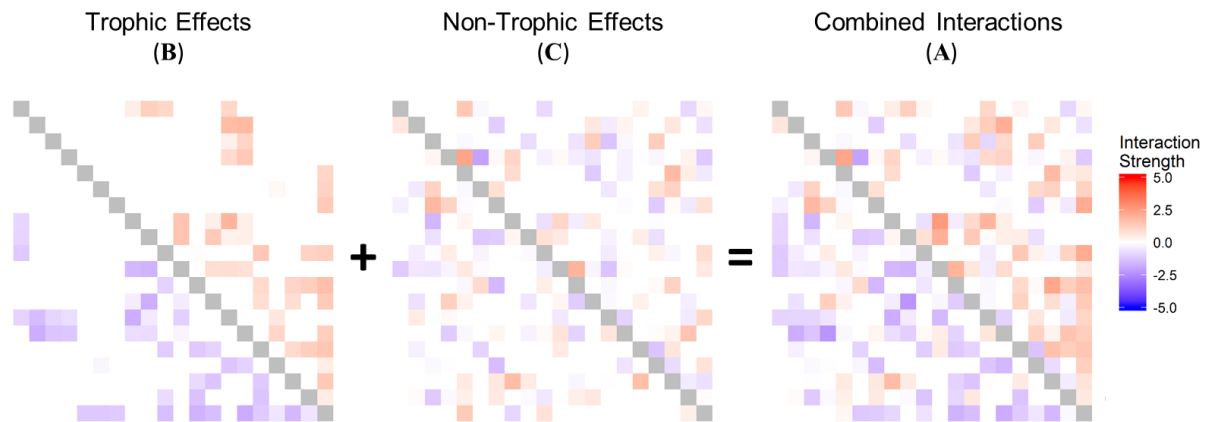

72

73 *Figure 2. Illustration of construction of interaction matrices. At an assumed equilibrium, a combined*  
74 *interaction matrix (A) can be split into the impact of trophic (B) and non-trophic effects (C). The*  
75 *species are arranged approximately in trophic height order, with basal species top/left and top*  
76 *predators at the bottom/right. The underlying trophic network was generated by a niche model ( $S$*   
77 *=20,  $C=0.2$ ), parameterised with a bivariate normal distribution  $\mathcal{N}(\mu_x = -1, \mu_y = 1, sd_x =$*   
78 *0.5,  $sd_y = 0.5, \rho = -0.8$ ). Intra-specific interactions were fixed at zero and shown in grey.*

79

80 *Figure 3: Illustration of the distributions of TIMs and their impacts tested in this study, with*  
81 *representative non-trophic interaction matrices for a 20 species trophic network and a TIM density of*  
82 *5 per species. Full specification of the distributions are given in Table S1. Mean magnitude of*

83 *individual non-trophic effects was held constant at 0.5.*

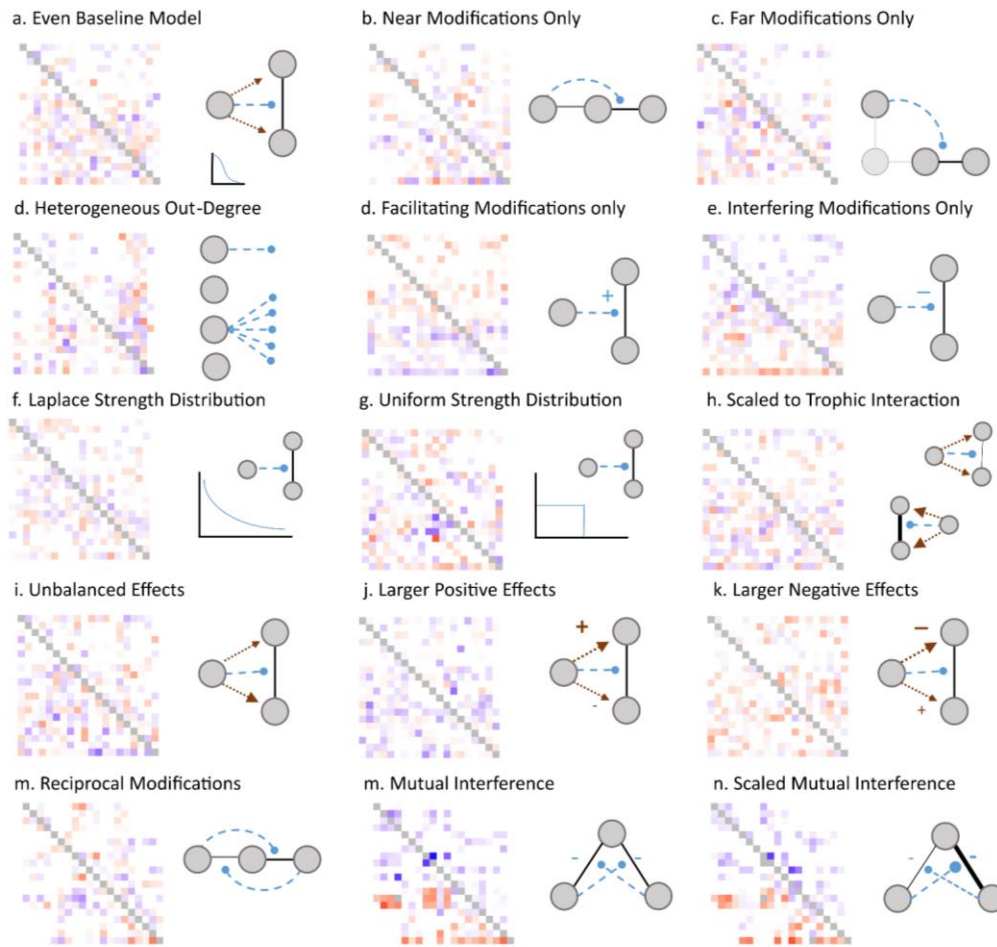

84

85 As the density of TIMs (the expected number of TIMs per species) was increased, the degree of self-  
 86 regulation that would be necessary for local asymptotic stability ( $\Re(\lambda_1^A)$ , henceforth ‘stability’)  
 87 always decreased while reactivity (the size of the initial response to perturbation,  $\lambda_1^H$ ,  $H = \frac{A+A^T}{2}$ )  
 88 always increased (Figure 4a, b). Within this overall pattern, a number of TIM distributions led to  
 89 markedly different responses, discussed below. Although the remainder of the TIM models had  
 90 impacts on stability that were not meaningfully different to random NTEs, there was a small but  
 91 discernible split in their reactivity response (Figure S1b). Models that led to NTEs being focussed,  
 92 clumped or unbalanced (Larger Negative NTEs, Laplace strength distribution, Nearby TIMs,  
 93 Unbalanced NTEs, Heterogeneous out-degree and Reciprocal modifications models) led to a higher

94 reactivity than those that had a more even effect distribution (Baseline, Scaled, Random NTE, Far  
 95 TIMs, Uniform strength distribution).

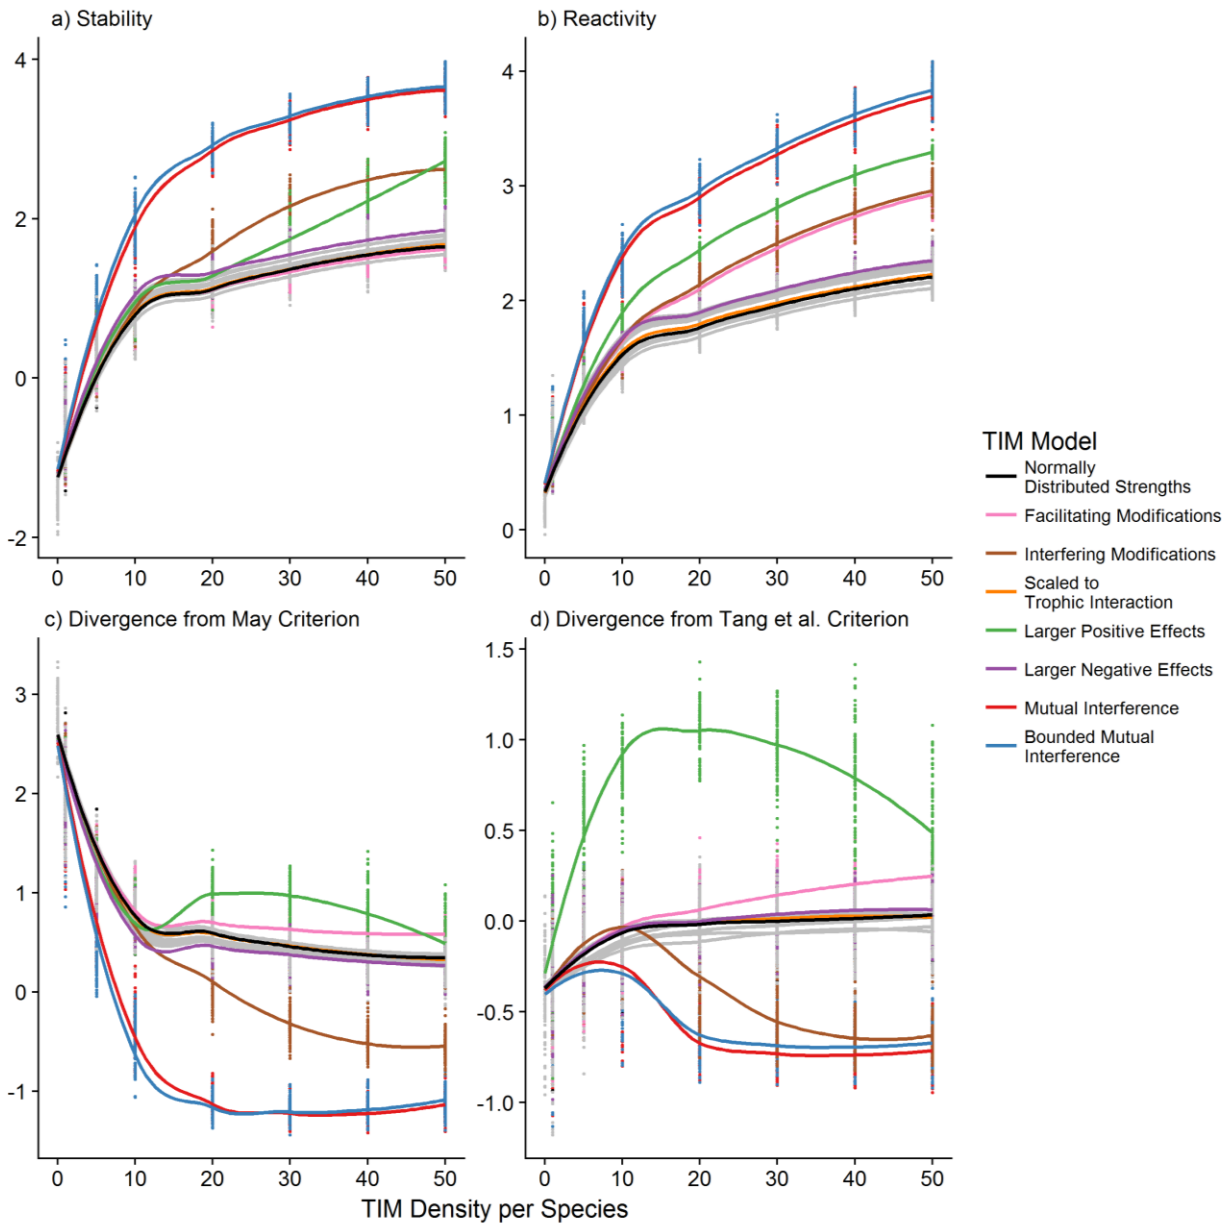

96

97 *Figure 4. Effect of increasing density of TIMs on (a) stability  $\log(\Re(\lambda_1^A))$ , the degree of self-regulation*  
 98 *necessary for local asymptotic stability, (b) system reactivity  $\log(\lambda_1^H)$ , (c) the log-ratio of the May*  
 99 *stability criterion and the observed stability and (d) the log-ratio of the Tang et al stability criterion*  
 100 *and the observed stability. TIM distribution models with distinctive responses are highlighted, the*

101 *remainder are coloured grey and are plotted in Figure S1. Loess fitted lines have been added to*  
102 *highlight differences.*

103 The two mutual interference models, representing cases where two resources that share a  
104 consumer both negatively affect the consumption of the other (Figure 3.n-o), had the greatest  
105 impact on stability and reactivity. At higher levels of TIM density, interfering modifications (which  
106 weaken a trophic interaction and are beneficial for the resource and detrimental for the consumer,  
107 at least in the short term, Figure 3.f) caused greater instability and reactivity than other models.  
108 Facilitating modifications (Figure 3.e) did not cause a distinct impact on stability, but the impact on  
109 reactivity closely matched the interfering modification distribution. The distribution with larger  
110 positive NTEs (Figure 3.k) also caused distinct effects, reducing stability at high TIM densities but  
111 increasing reactivity faster than baseline models at all TIM densities. Results for further analyses  
112 where trophic interactions negatively affected resources more than consumers benefitted followed  
113 broadly the same pattern, with the exception that the model with larger positive NTEs had reduced  
114 impact as the overall mean interaction strength remained negative (Figure S2 & S3).

115 To assess the extent to which the interspecific interactions were non-randomly structured we  
116 examined the performance of two analytic criteria for local stability (That of May<sup>1</sup>:  $\lambda_1 =$   
117  $\max((S - 1)\mu, \sqrt{SV} - \mu)$  and Tang et al.<sup>33</sup>:  $\lambda_1 = \max((S - 1)\mu, \sqrt{SV}(1 - \rho) - \mu)$ , where S is the  
118 number of species, V is the variance in interaction strength,  $\mu$  is the mean interaction strength and  $\rho$   
119 is the pairwise correlation between interaction terms). Many of the TIM distributions we tested  
120 showed a reduced divergence of the true stability from that estimated by the stability criteria (Figure  
121 4c and 4d). This suggests that the TIMs are moving the systems closer to fulfilling the assumptions of  
122 random matrix theory under which the criteria are derived, namely that individual interactions are  
123 independently and identically distributed<sup>34,35</sup>, despite the observable structure being introduced (S.I.  
124 Table S2). However, the same TIM models that significantly impacted stability, increase the  
125 divergence between the true stability of a system and that estimated by either stability criteria,

126 showing that the TIMs are having consequences which are not captured by the mean, variance and  
127 correlation of the matrix elements. All three interference TIM models led to communities that were  
128 more stable than expected by the criteria while larger positive NTEs and facilitating TIMs were less  
129 stable. Simple, but plausible, distributions of TIMs can therefore be seen to push communities either  
130 closer or further (in either direction) from expectations based on the study of random matrices<sup>36</sup>  
131 than may be expected from analyses of trophic interactions alone.

132 The structural feature of the resultant matrices that can best explain stability across the set of  
133 communities was  $\rho$ , the correlation between pairwise elements of the overall interaction matrix **A**,  
134 with an  $r^2$  of 0.884 over all the generated communities (Figure S4) This can also be observed in the  
135 marked superiority of the Tang et al. criterion over the May criterion (Figure 4c-d), although pairwise  
136 correlation,  $\rho$ , was a less good predictor of stability at weak (near zero) levels of correlation.

137 Our results contrast with those of Bairey et al.<sup>25</sup>, who found that the classic negative relationship  
138 between complexity and diversity can be reversed with higher order interactions. Using  
139 unstructured random matrices, their findings were driven by a decrease in the variance of the  
140 resulting NTE matrices due to an increasing central tendency of the strength of resultant pairwise  
141 interactions when composed of an increased number of random elements drawn from higher-order  
142 array. It is clear from our results that non-random distribution of NTEs can have a considerable  
143 impact by introducing additional variance and structure to the overall interaction network.

#### 144 *Mutual Interference TIMs*

145 The mutual interference model of TIMs is strongly destabilising, despite the lower variance in overall  
146 interaction strength (since negative non-trophic interactions overlap with positive trophic  
147 interaction terms), which would normally be expected to increase stability<sup>1</sup>. This effect is driven  
148 largely by emergent pairwise mutualism, long-recognised as destabilising for interaction matrices<sup>37</sup>.  
149 The NTEs induced by these TIMs are very efficient at breaking down the negative correlation  
150 between pairwise elements (Figure S4), inducing mutualistic effects between resources that share a



151 consumer. However, the maintained divergence from the Tang et al. criteria, which includes pairwise  
152 correlation, suggests additional higher-level structural contributions.

153 The mutual interference models result in a high variance in the elements of the NTE matrix **C** since  
154 they tend to focus negative and positive NTEs on to distinct groups of species (the high-level  
155 consumers and low-level resources). However, since in this model resources exert negative NTEs  
156 upon their consumers, matrices **B** and **C** have a low covariance, and the resultant variance of **A** is  
157 lower than that derived from other NTE distributions. The importance of the sign structure of  
158 interference can also be seen in the comparative lack of distinction of the tightly reciprocal  
159 interaction modification distribution (Fig 3m) compared to random NTE distributions– it is the  
160 specific sign patterning of the links that drives the change to the dynamics, not the topological  
161 clustering of the modifications.

162 Reciprocal negative effects between consumers can be generated by a range of mechanisms,  
163 including predator satiation<sup>38</sup>, adaptive foraging<sup>39</sup> and associational defence<sup>40</sup>. These effects are  
164 widespread<sup>41</sup> and are regularly included in general models of population dynamics<sup>42</sup> through multi-  
165 species functional responses<sup>43</sup>, yet the resultant dynamic links are rarely considered in network  
166 based analyses. The divergence with conclusions drawn from small community modules, where  
167 switching is generally considered stabilising<sup>44–46</sup>, reinforces the need to consider dynamics across  
168 scales and mechanisms.

### 169 *Sign Effects of TIMs*

170 Interfering TIMs, which are beneficial for resources and detrimental for consumers, have a strongly  
171 destabilising effect at high TIM densities. The interfering TIM model differs from the facilitating TIM  
172 model only in the sign patterning of the NTEs, yet it has greatly different effects on stability because  
173 of the relationship with the underlying trophic interactions. Under these distributions, species at  
174 either end of food chains are only susceptible to one sign of NTE, resulting in the banded sign  
175 pattern observable in Figure 3e and 3f. Since there are distinct patterns in the underlying trophic

176 interaction distributions (Figure 2) the covariance between matrices **B** and **C** is higher for facilitating  
177 modifications than interfering (Table S2). Hence, a large number of interfering interaction  
178 modifications tends to lead to weaker overall pairwise exploitative relationships, despite our model  
179 keeping underlying trophic interaction strength fixed. This reduces the variance and pairwise  
180 correlation,  $\rho$ , of **A** faster than randomly signed TIMs (e.g. with a TIM density of 10,  $\rho = -0.55$   
181 compared to  $-0.61$ , Table S2). Conversely, facilitating modifications break down the pairwise  
182 correlation slightly slower ( $\rho = -0.62$ , at TIM density of 10) than random interactions.

183 Both facilitating and interfering TIM distributions had similar effects on reactivity (Figure 4b).  
184 Reactivity<sup>47,48</sup> is dependent on the eigenvalues of  $(\mathbf{A} + \mathbf{A}^T)/2$ , effectively a matrix composed of  
185 mean pairwise interaction strengths. Both facilitating and interfering TIM distributions result in  
186 strong row patterning of this matrix. In biological terms, certain species at either end of food chains  
187 accrue consistently stronger interactions, generating reactivity. While NTEs from TIMs are not  
188 directly reciprocal, if either interfering or facilitating modifications are more common, consistent  
189 patterns can develop across trophic levels.

190 In the case where positive NTEs were larger than negative NTEs, changes in stability were driven by  
191 the increasingly positive mean interaction strength. This is highlighted by the stability criterion  
192 estimate being determined by the expected row sum component,  $(S - 1)\mu$ , of the criterion for all  
193 but the fewest TIMs. There was no particular impact of the imbalance itself – both the unbalanced  
194 NTE model and the model where negative NTEs were consistently larger were not notably different  
195 from the random NTE case.

196 At present, the empirical balance between facilitating and interfering modifications and their  
197 distribution throughout ecological communities is effectively unknown, as is the balance between  
198 resultant positive and negative consequences for interactors. While the all or nothing cases  
199 discussed here represent extreme cases, they show that this data will be essential in determining the  
200 impact of non-trophic effects on dynamics.

201 *TIMs and Row Structuring*

202 It has been suggested that row-structuring (where the rows of **A** having markedly different means) is  
203 key for stability of empirical networks<sup>49</sup>, although the effects may be greater on the rate of return to  
204 equilibrium than the sign of the eigenvalue<sup>50</sup>. Row structuring in trophic networks is a consequence  
205 of the consistent dependence of population level interaction strength on interactor density. TIMs  
206 may cause row and column structuring by two distinct mechanisms. Firstly, dominant species that  
207 take part in strong interactions may be expected to be the receiver of strong NTEs caused by  
208 interaction modifications – even a small change in a large interaction could be expected to have a  
209 large overall effect on the flow of energy through a community as a whole. Secondly, species that  
210 induce a disproportionate number of interaction modifications (ecological engineers<sup>51,52</sup>) have the  
211 potential to introduce considerable column-structuring effects. Such ecological engineers causing a  
212 large number of interaction modifications may not necessarily be those involved in the strongest  
213 trophic interactions. NTEs exerted by such species may serve to break down or replace existing  
214 column structure. However, our results suggest that high variation in the number of TIMs each  
215 species exerts (out-degree heterogeneity, Figure 3d), representing such a scenario, does not affect  
216 stability differently to random NTEs in the artificial trophic networks.

217 *Empirical Trophic Networks*

218 When we repeated our analysis for five empirical marine fishery trophic networks in the set  
219 compiled by Jacquet et al.<sup>49</sup> we found distinct results (Figure 5). In contrast to the artificial networks,  
220 models where NTEs scaled with the underlying trophic interactions had by far the most significant  
221 effects on dynamics of the empirical networks. This occurred despite the mean magnitude of  
222 individual NTEs being kept constant between methods of introducing TIMs. In 4 out of 5 cases  
223 mutual interference led to more instability, although in the one case (the ‘Newfoundland’ network)  
224 the effect was opposite – the unscaled mutual interference model was stabilising. In another case

225 (the ‘Mid-Atlantic Bight’ network), many of the TIM models led to a small increase in stability, with  
 226 the largest effect from facilitating modifications.

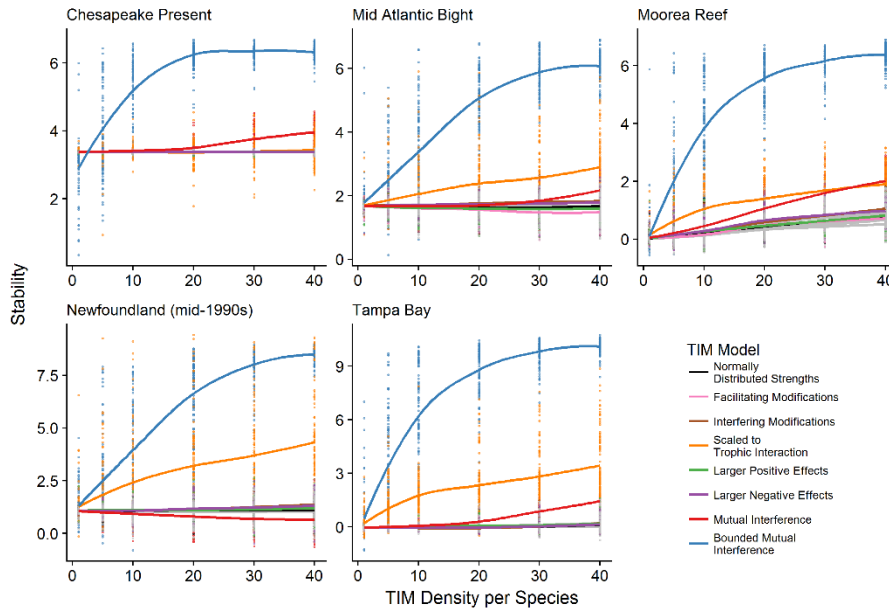

227

228 *Figure 5. Stability,  $\Re(\lambda_1^A)$ , of five empirically parameterised food webs with increasing density of*  
 229 *TIMs. TIM distribution models with distinctive responses are highlighted, the remainder are coloured*  
 230 *grey and are plotted in Figure S5. Loess fitted lines have been added.*

231 The empirical networks studied here differ significantly from randomly generated networks (see  
 232 Jacquet et al.<sup>49</sup> for a full discussion). They include both significant row-structuring and an  
 233 approximately log-normal interaction trophic strength distribution. A minority of very strong, mostly  
 234 negative, interactions represent large transfers of biomass between dominant species in the  
 235 community (SI 5), resulting in a highly leptokurtic (‘fat-tailed’) distribution of trophic interaction  
 236 strengths and a very low correlation coefficient (range  $\rho = -0.014 : -0.001$ ). In such a case, unless the  
 237 TIMs are scaled with the underlying trophic interactions, most interaction modification distributions  
 238 effectively only add noise.

239 Consequently, the introduction of TIMs hardly changed the overall pairwise correlation - the largest  
 240 value of  $\rho$  across all TIM iterations was just -0.016. The NTEs introduced by the scaled models

241 matched the highly leptokurtic distribution of the trophic interactions leading to an increased  
242 variance in NTEs. However, even the increase in variance of the ‘scaled’ distributions was several  
243 orders of magnitude smaller than the variance in the underlying trophic interactions (SI 6). Hence,  
244 the stability criteria were almost completely unresponsive to the introduction of TIMs (Figure S6).  
245 Nevertheless, a handful of strong NTE links can be observed to cause great destabilisation, while in  
246 most cases the comparatively weak links introduced by TIMs from constrained, unscaled,  
247 distributions had very little effect on stability.

## 248 **Discussion**

249 Our results show that interaction modifications have the potential to cause significant disruptive  
250 effects in ecological communities yet the inter-relationship between non-trophic and trophic  
251 interactions is critical to understanding their consequences. Our work reiterates the importance of  
252 the relationship between superimposed interaction networks<sup>12,26</sup>. TIMs can influence the stability of  
253 systems through a number of distinct mechanisms beyond introducing additional connectance. They  
254 can shift the average interaction sign, change pairwise correlation coefficients, introduce additional  
255 row structure and change the interaction strength distribution. Furthermore, given the potential for  
256 interaction modifications to short-circuit established trophic interaction motifs, such as trophic  
257 cascades, the distribution of interaction motifs in ecological communities<sup>53,54</sup> may need to be re-  
258 examined to incorporate non-trophic effects.

259 Empirical data on the distribution of interaction modifications in real communities will be essential  
260 to discern their true effects. The distribution of interaction modifications in real communities is at  
261 present essentially unknown beyond a limited number of inter-tidal communities<sup>55,56</sup>. The fraction of  
262 interspecific interactions driven by interaction modifications is unknown, but likely to be large<sup>18,57</sup>.  
263 The set of TIM models used here attempt to map some of the properties real distributions of  
264 interaction modifications could have and identify features pertinent to dynamics. Thus, they provide  
265 a stepping stone between analytical random matrix approaches<sup>25</sup> and empirically parameterised

266 systems. Ideally, empirical data will need to include information about both the topology and  
267 strength of the non-trophic, which is possible, but challenging, to acquire<sup>22,29</sup>. This could lead to the  
268 identification of regular patterns across ecosystems in the features identified here as pertinent to  
269 community dynamics. Whilst it is unlikely that there will be strong mechanistic drivers of non-trophic  
270 network structure equivalent to the role of body-size within trophic interaction networks<sup>58-60</sup>, there  
271 is nevertheless room for a great improvement in our phenomenological understanding of the  
272 distribution of interactions modifications.

273 Studies focussed exclusively on trophic networks are missing a large portion of the dynamic  
274 interactions occurring in ecological communities. Ultimately, the dynamics of ecological  
275 communities are dependent on the strength of interactions not whether they are caused by trophic  
276 or non-trophic effects. Trophic interaction modifications can provide a framework to leverage our  
277 understanding of trophic networks to make significant inroads into the study of non-trophic effects.  
278 The key questions in ecological dynamics cannot be satisfactorily resolved until non-trophic  
279 interactions are fully integrated into community ecology.

## 280 **Methods**

### 281 *Communities as Interaction Matrices*

282 We represent the complete set of interactions in a system as a Jacobian matrix **A**, also termed a  
283 community matrix<sup>61</sup>, which is assumed to be derived from a set of populations each at a feasible  
284 equilibrium. Each element of **A**,  $a_{ij}$ , represents the instantaneous effect of a change in the  
285 population of species  $j$  on the population of species  $i$ . The community matrix is considered to be  
286 based on a linearisation of more complex processes that govern the relationships between the  
287 species and as such the description of the interactions is only strictly applicable close to the original  
288 non-trivial equilibrium. We determine **A** to be constructed from the combination of two matrices  
289 specifying the trophic (**B**) and non-trophic (**C**) interactions present in the community (Figure 2). For

290 all matrices, we only consider inter-specific interactions, all intra-specific diagonal terms ( $a_{ii}$ ) were  
291 set to zero (see below).

### 292 *Generating Trophic Networks*

293 We determined the trophic topology of the artificial communities using the niche model<sup>31</sup>, a network  
294 generating algorithm that has been shown to reproduce many of the features of real food webs<sup>62</sup>.  
295 We generated 100 networks each with 60 species ( $S$ ) and target connectance of 0.2. We  
296 parameterised these interactions with draws from a bivariate normal distribution  $\mathcal{N}(\mu_x = -1, \mu_y =$   
297  $1, sd_x = 0.5, sd_y = 0.5, \rho = -0.8)$  to create each trophic interaction matrix  $\mathbf{B}$ , following Allesina et  
298 al.<sup>63</sup>. This specification maintains an average interaction strength of 0 and an overall symmetry in  
299 impacts between consumer and resource. This simplifies analysis but is known to be unrealistic<sup>64</sup>.  
300 We therefore repeated the analysis with increased consumer effects on resources ( $\mu_x = -5$  &  $-10$ , SI  
301 3). Since the draws are unbounded a small fraction of interactions had the ‘wrong’ sign for an  
302 exploitative interaction. As exploitative interactions still made up the overwhelming bulk of  
303 interactions, we did not remove these and for convenience we will refer to these underlying  
304 networks as trophic networks.

### 305 *Incorporating Interaction Modifications*

306 Trophic interaction modifications are ‘higher order interactions’ that act through at least three  
307 species<sup>29</sup>. However, the short-term consequences of the interaction modification can be linearised  
308 to identify the effect of the modifier on the consumer and the resource<sup>24,25</sup> at the system state  
309 under consideration (Figure 1). These non-trophic effects (NTEs) can be used to construct a matrix,  
310  $\mathbf{C}$ , of ‘direct’ effects caused by the TIMs. In our representation the value of the original pairwise  
311 trophic interaction is left unchanged, i.e. it is assumed that the trophic interaction strengths in  $\mathbf{B}$   
312 already incorporates the consequence of the equilibrium level of the modifier species.

313 From the trophic networks, NTE matrices were generated from distributions of TIMs (detailed in  
314 Table S1, and summarised in Figure 2) that varied in topology, strength distribution and translation  
315 from TIM to NTEs. Since the distribution of interaction modifications in real communities is at  
316 present essentially unknown, this large collection of models is an attempt to span the range of  
317 potential distributions to identify key features pertinent to dynamics. In addition, we also tested an  
318 NTE distribution model where there was no underlying interaction modification structure and NTEs  
319 were independently randomly distributed with their strengths drawn from a Normal distribution.  
320 Each TIM was assigned an effect size parameter ( $c_{ijk}$ ), such that the mean magnitude of individual  
321 non-trophic effects ( $\alpha$ ) incorporated into a community is 0.5, in line with results from meta-analysis  
322 that suggests an approximate correspondence between the strength of trophic and non-trophic  
323 interactions<sup>19</sup>. A positive  $c_{ijk}$  indicates that an increase in the modifying species would increase the  
324 strength of the interaction. It follows that this would lead to a positive effect of the modifier on the  
325 consumer and a negative effect of the modifier on the resource. A negative  $c_{ijk}$  would cause the  
326 reverse. The  $c_{ijk}$  values determined the NTEs of the modifier on the two interactors ( $\mathbf{C}_{ik}$ ,  $\mathbf{C}_{jk}$ ) and  
327 were used to construct a TIM effect matrix  $\mathbf{C}$ , Table S1.

328 We only considered TIMs where species modified the interaction between two other species - we  
329 did not allow species to modify their own interactions. Multiple NTE from one species to another  
330 were combined additively. TIMs were introduced at a TIM density (defined as the expected number  
331 of TIMs in the network per species,  $\omega$ ) of 0, 1, 5, 10, 20, 30, 40 and 50. For a given trophic network,  
332 we identified each potential TIM that could exist following a particular distribution model, and  
333 assigned each potential TIM a probability of existing equal to  $\frac{\omega S}{\kappa}$ , where  $\kappa$  is the total number of  
334 potential TIMs (i.e. combinations of consumer-resource and third species) and  $S$  the number of  
335 species. Note that TIM density as defined here is distinct to both 'TIM connectance' (the fraction of  
336 possible TIMs that are observed, which is dependent on the trophic connectance) and to non-trophic



337 connectance (the resultant fraction of non-zero elements of the consequent TIM effect matrix **C**,  
338 which is dependent on the distribution and overlap of the TIMs).

339 We applied each of the 16 NTE distribution models at each TIM density across each of the 100  
340 underlying trophic networks for a total set of 11 200 community models including TIMs.

#### 341 *Properties of Interaction Matrices*

342 Structural properties of the resultant interaction matrices were calculated:

- 343 • Mean interaction strength ( $\mu$ ) of **A**
- 344 • Connectance (fraction non-zero entries) of **A** and **C**,
- 345 • Variance ( $V$ ) of the off-diagonal elements of **A** and of **C**,
- 346 • Degree heterogeneity of **A** as the variance of the normalised in and out-degree distribution,
- 347 • Correlation ( $\rho$ ) of the pairwise elements of **A**:  $\frac{E(a_{ij}a_{ji})-\mu^2}{V}, (a_{ij}, a_{ji})_{i \neq j}$
- 348 • Covariance between **B** and **C**,
- 349 • Row structure  $\zeta_{row}$  as the variance in mean interaction magnitude across rows  $Var(\frac{\sum_j |a_{ij}|}{S})$   
350 and likewise:
- 351 • Column structure  $\zeta_{col}, Var(\frac{\sum_i |a_{ij}|}{S})$ .

352 We separately compared the mean value of each of the above structural properties across the 100  
353 trophic networks for each of the TIM distribution models to the baseline TIM model at a  
354 representative TIM density of 10 using a linear model (two-tailed).

355 Local asymptotic stability is determined by the sign of the real part of the leading (dominant)  
356 eigenvalue of **A**,  $\Re(\lambda_1^A)$ , under the assumption that the community is at an equilibrium. If negative,  
357 the system will eventually return to the original equilibrium after a small perturbation and is  
358 considered locally stable. The diagonal elements of **A** specify the self-regulation of each species.  
359 With sufficient self-regulation any community can be stabilised. Although the distribution of self-

360 regulation effects can have important consequences<sup>65</sup> we follow previous work<sup>49,66</sup> and set all  
361 diagonal elements of  $\mathbf{A}$  to zero to focus on the impact of the inter-specific interactions. Without self-  
362 regulation,  $\Re(\lambda_1^{\mathbf{A}})$  will always be positive but can be interpreted as how far a system is from stability,  
363 i.e. how much self-regulation would be necessary to stabilise the system. Hence, although local  
364 stability is a binary property, we can use “less stable” to refer to a system farther from stability (a  
365 larger  $\Re(\lambda_1^{\mathbf{A}})$ ).

366 The immediate response of a system to perturbation is described by its reactivity, the maximum  
367 instantaneous amplification of a small perturbation<sup>47,48</sup>. This is computed as the leading eigenvalue  
368 of the Hermitian part of the community matrix:  $\lambda_1^{\mathbf{H}}$ ,  $\mathbf{H} = \frac{\mathbf{A} + \mathbf{A}^T}{2}$ . Since  $\mathbf{H}$  is symmetric, its eigenvalues  
369 are real.

370 To assess the extent to which the communities were non-randomly structured we tested the  
371 performance of two analytic criteria for local stability derived from generalisations of the circular law  
372 of random matrix theory<sup>1,34,67</sup>. We refer to these as the May criterion:  $\max((S - 1)\mu, \sqrt{SV} - \mu)$   
373 and the Tang et al. criterion:  $\max((S - 1)\mu, \sqrt{SV}(1 - \rho) - \mu)$ .  $S$  is the number of species (the  
374 size of the matrix),  $V$  is the variance in interaction strength,  $\mu$  is the mean interaction strength and  $\rho$   
375 is the pairwise correlation between interaction terms,  $\frac{E(a_{ij}a_{ji}) - \mu^2}{V}$ . The first term of each criteria  
376 specifies the eigenvalue derived from the expected row-sum<sup>5</sup>. In most trophic networks (where  
377  $\mu < 0$ ), this term is usually the smaller and can be safely ignored, but this is not necessarily true with  
378 the addition of non-trophic effects. The second term estimates the radius of the ellipse containing  
379 the eigenvalues along the real axis, and hence the likely position of the right-most (dominant)  
380 eigenvalue, under the assumptions of random matrix theory: that the matrix is large and the entries  
381 are independent and identically distributed<sup>34,35</sup>.

382 *Empirical Trophic Networks*

383 The stability analysis was repeated for the five largest empirical trophic networks in the set compiled  
384 by Jacquet et al. <sup>49</sup>. These are models of the trophic interactions in marine fisheries that had been  
385 parameterised by the EcoPath modelling approach <sup>68</sup> and converted to Jacobian matrices following  
386 the method of de Ruiter et al. (1995). These networks were: Chesapeake Bay (n = 41, links = 167,  
387 Christensen et al. 2009), Mid Atlantic Bight (n = 51, links = 515, Okey and Pugliese 2001), Moorea  
388 Barrier Reef (n = 39, links = 267, Arias-González et al. 1997), mid-1990s Newfoundland Grand Banks  
389 (n = 48, links = 525, Heymans and Pitcher 2002) and Tampa Bay (n = 48, links = 340, Walters et al.  
390 2005).

391 Interaction modifications were introduced at densities of 1, 5, 10, 20, 30 and 40 TIMs per species  
392 with 100 replicates of each TIM distribution model at each density for each of the trophic networks  
393 for a total set of 48 000 communities. The mean strength of the interaction modifications ( $\alpha$ )  
394 introduced to each trophic network was set at half the mean strength of the positive trophic  
395 interactions web (range 0.017-0.18) to be comparable with the artificial networks.

#### 396 **Data and Code Availability**

397 All generated data and R scripts used in the analysis is available on OSF DOI:10.17605/OSF.IO/6FNAV

#### 398 **Acknowledgements**

399 JCDDT is funded through the Natural Environmental Research Council through the Oxford  
400 Environmental Research Doctoral Training Program (NE/L002612/1)

#### 401 **Author contributions**

402 JCDDT initiated the research, and JCDDT, MBB and RJM contributed to the ideas presented in the  
403 manuscript. JCDDT conducted the research, facilitated by discussions with RJM and MBB. JCDDT wrote  
404 the first draft of the manuscript, and all authors contributed substantially to revisions.

#### 405 **Competing Interests**

406 The authors declare no competing interests.

407

- 408 1. May, R. M. Will a large complex system be stable? *Nature* **238**, 413–414 (1972).
- 409 2. Montoya, J. M., Pimm, S. L. & Solé, R. V. Ecological networks and their fragility. *Nature* **442**, 259–64  
410 (2006).
- 411 3. McCann, K., Hastings, A. & Huxel, G. R. Weak trophic interactions and the balance of nature. *Nature*  
412 **395**, 794–798 (1998).
- 413 4. Neutel, A.-M., Heesterbeek, J. A. P. & de Ruiter, P. C. Stability in Real Food Webs: Weak Links in Long  
414 Loops. *Science* **296**, 1120–1123 (2002).
- 415 5. Allesina, S. & Tang, S. Stability criteria for complex ecosystems. *Nature* **483**, 205–208 (2012).
- 416 6. Grilli, J., Rogers, T. & Allesina, S. Modularity and stability in ecological communities. *Nat. Commun.* **7**,  
417 1–10 (2016).
- 418 7. Varley, G. The natural control of population balance in the knapweed gall-fly (*Urophora jaceana*). *J.*  
419 *Anim. Ecol.* **16**, 139–187 (1947).
- 420 8. Johnson, S. & Jones, N. S. Looplessness in networks is linked to trophic coherence. *Proc. Natl. Acad. Sci.*  
421 201613786 (2017). doi:10.1073/pnas.1613786114
- 422 9. Ings, T. C. *et al.* Ecological networks - beyond food webs. *J. Anim. Ecol.* **78**, 253–269 (2009).
- 423 10. Fontaine, C. *et al.* The ecological and evolutionary implications of merging different types of networks.  
424 *Ecol. Lett.* **14**, 1170–1181 (2011).
- 425 11. García-Callejas, D., Molowny-Horas, R. & Araújo, M. B. Multiple interactions networks: towards more  
426 realistic descriptions of the web of life. *Oikos* **127**, 5–22 (2018).
- 427 12. Piloşof, S., Porter, M. A., Pascual, M. & Kéfi, S. The multilayer nature of ecological networks. *Nat. Ecol.*  
428 *Evol.* **1**, 0101 (2017).
- 429 13. Kéfi, S. *et al.* More than a meal... integrating non-feeding interactions into food webs. *Ecol. Lett.* **15**,  
430 291–300 (2012).
- 431 14. Mougi, A. & Kondoh, M. Diversity of Interaction Types and Ecological Community Stability. *Science* **337**,  
432 349–351 (2012).
- 433 15. Coyte, K. Z., Schluter, J. & Foster, K. R. The ecology of the microbiome: Networks, competition, and

- 434 stability. *Science* **350**, 663–666 (2015).
- 435 16. Olf, H. *et al.* Parallel ecological networks in ecosystems. *Philos. Trans. R. Soc. London B Biol. Sci.* **364**,  
436 1755–1779 (2009).
- 437 17. Wootton, J. T. Indirect Effects and Habitat Use in an Intertidal Community: Interaction Chains and  
438 Interaction Modifications. *Am. Nat.* **141**, 71–89 (1993).
- 439 18. Werner, E. E. & Peacor, S. D. A Review of Trait-Mediated Indirect Interactions in Ecological  
440 Communities. *Ecology* **84**, 1083–1100 (2003).
- 441 19. Preisser, E. L., Bolnick, D. I. & Benard, M. F. Scared to death? The effects of intimidation and  
442 consumption in predator-prey interactions. *Ecology* **86**, 501–509 (2005).
- 443 20. Ohgushi, T., Schmitz, O. & Holt, R. D. *Trait-Mediated Indirect Interactions: Ecological and Evolutionary*  
444 *Perspectives*. (Cambridge University Press, 2012).
- 445 21. Levine, J. M., Bascompte, J., Adler, P. B. & Allesina, S. Beyond pairwise mechanisms of species  
446 coexistence in complex communities. *Nature* **546**, 56–64 (2017).
- 447 22. Mayfield, M. M. & Stouffer, D. B. Higher-order interactions capture unexplained complexity in diverse  
448 communities. *Nat. Ecol. Evol.* **1**, 0062 (2017).
- 449 23. Yodzis, P. Diffuse effects in food webs. *Ecology* **81**, 261–266 (2000).
- 450 24. Wilson, D. S. Complex Interactions in Metacommunities, with Implications for Biodiversity and Higher  
451 Levels of Selection. *Ecology* **73**, 1984–2000 (1992).
- 452 25. Bairey, E., Kelsic, E. D. & Kishony, R. High-order species interactions shape ecosystem diversity. *Nat.*  
453 *Commun.* **7**, 12285 (2016).
- 454 26. Kéfi, S., Miele, V., Wieters, E. A., Navarrete, S. A. & Berlow, E. L. How Structured Is the Entangled Bank?  
455 The Surprisingly Simple Organization of Multiplex Ecological Networks Leads to Increased Persistence  
456 and Resilience. *PLOS Biol.* **14**, e1002527 (2016).
- 457 27. Golubski, A. J., Westlund, E. E., Vandermeer, J. & Pascual, M. Ecological Networks over the Edge:  
458 Hypergraph Trait-Mediated Indirect Interaction (TMII) Structure. *Trends Ecol. Evol.* **31**, 344–354 (2016).
- 459 28. Dunne, J. A. & Pascual, M. *Ecological Networks: Linking Structure to Dynamics in Food Webs*. (Oxford  
460 University Press, 2006).
- 461 29. Terry, J. C. D., Morris, R. J. & Bonsall, M. B. Trophic interaction modifications: an empirical and  
462 theoretical framework. *Ecol. Lett.* **20**, 1219–1230 (2017).

- 463 30. Golubski, A. J. & Abrams, P. A. Modifying modifiers: what happens when interspecific interactions  
464 interact? *J. Anim. Ecol.* **80**, 1097–1108 (2011).
- 465 31. Williams, R. J. & Martinez, N. D. Simple rules yield complex food webs. *Nature* **404**, 180–183 (2000).
- 466 32. Allesina, S. *et al.* Predicting the stability of large structured food webs. *Nat. Commun.* **6**, 7842 (2015).
- 467 33. Tang, S., Pawar, S. & Allesina, S. Correlations between interaction strengths drives stability in large  
468 ecological networks. *Ecol. Lett.* **17**, 1094–1100 (2014).
- 469 34. Allesina, S. & Tang, S. The stability–complexity relationship at age 40: a random matrix perspective.  
470 *Popul. Ecol.* **57**, 63–75 (2015).
- 471 35. Tao, T. *Topics in Random Matrix Theory*. (American Mathematical Society, 2012).
- 472 36. James, A. *et al.* Constructing Random Matrices to Represent Real Ecosystems. *Am. Nat.* **185**, 680–692  
473 (2015).
- 474 37. May, R. M. *Stability and Complexity in Model Ecosystems*. (Princeton University Press, 1973).
- 475 38. Jeschke, J. M., Kopp, M. & Tollrian, R. Consumer–food systems: why type I functional responses are  
476 exclusive to filter feeders. *Biol. Rev.* **79**, 337–349 (2004).
- 477 39. Abrams, P. A. Quantitative descriptions of resource choice in ecological models. *Popul. Ecol.* **52**, 47–58  
478 (2010).
- 479 40. Barbosa, P. *et al.* Associational Resistance and Associational Susceptibility: Having Right or Wrong  
480 Neighbors. *Annu. Rev. Ecol. Evol. Syst.* **40**, 1–20 (2009).
- 481 41. Bruno, J. F., Stachowicz, J. J. & Bertness, M. D. Inclusion of facilitation into ecological theory. *Trends*  
482 *Ecol. Evol.* **18**, 119–125 (2003).
- 483 42. Delmas, E., Brose, U., Gravel, D., Stouffer, D. B. & Poisot, T. Simulations of biomass dynamics in  
484 community food webs. *Methods Ecol. Evol.* (2016). doi:10.1111/2041-210X.12713
- 485 43. Koen-Alonso, M. in *From Energetics to Ecosystems: The Dynamics and Structure of Ecological Systems*  
486 (eds. Rooney, N., McCann, K. S. & Noakes, D. L. G.) 1–36 (Springer Netherlands, 2007).  
487 doi:10.1007/978-1-4020-5337-5
- 488 44. Murdoch, W. W. & Oaten, A. in *Advances in Ecological Research* **9**, 1–131 (1975).
- 489 45. Valdovinos, F. S., Ramos-Jiliberto, R., Garay-Narváez, L., Urbani, P. & Dunne, J. A. Consequences of  
490 adaptive behaviour for the structure and dynamics of food webs. *Ecol. Lett.* **13**, 1546–1559 (2010).
- 491 46. May, R. M. Predators that switch. *Nature* **269**, 103–104 (1977).

- 492 47. Neubert, M. G. & Caswell, H. Alternatives to resilience for measuring the responses of ecological  
493 systems to perturbations. *Ecology* **78**, 653–665 (1997).
- 494 48. Tang, S. & Allesina, S. Reactivity and stability of large ecosystems. *Front. Ecol. Evol.* **2**, 1–8 (2014).
- 495 49. Jacquet, C. *et al.* No complexity–stability relationship in empirical ecosystems. *Nat. Commun.* **7**, 12573  
496 (2016).
- 497 50. Gibbs, T., Grilli, J., Rogers, T. & Allesina, S. The effect of population abundances on the stability of large  
498 random ecosystems. 1–23 (2017). at <<http://arxiv.org/abs/1708.08837>>
- 499 51. Jones, C. G., Lawton, J. H. & Shachak, M. Organisms as Ecosystem Engineers Organisms as ecosystem  
500 engineers. *Oikos* **69**, 373–386 (1994).
- 501 52. Sanders, D. *et al.* Integrating ecosystem engineering and food webs. *Oikos* **123**, 513–524 (2014).
- 502 53. Milo, R., Shen-Orr, S., Itzkovitz, S. & Kashtan, N. Network Motif: Simple Building Blocks of Complex  
503 Networks. *Science* **298**, 298. (2002).
- 504 54. Stouffer, D. B., Camacho, J., Jiang, W. & Amaral, L. A. N. Evidence for the existence of a robust pattern  
505 of prey selection in food webs. *Proc. R. Soc. B Biol. Sci.* **274**, 1931–1940 (2007).
- 506 55. Kéfi, S. *et al.* Network structure beyond food webs : mapping non-trophic and trophic interactions on  
507 Chilean rocky shores. *Ecology* **96**, 291–303 (2015).
- 508 56. Sander, E. L., Wootton, J. T. & Allesina, S. What Can Interaction Webs Tell Us About Species Roles?  
509 *PLoS Comput. Biol.* **11**, e1004330 (2015).
- 510 57. Abrams, P. A. Arguments in Favor of Higher Order Interactions. *Am. Nat.* **121**, 887–891 (1983).
- 511 58. Petchey, O. L., Beckerman, A. P., Riede, J. O. & Warren, P. H. Size, foraging, and food web structure.  
512 *Proc. Natl. Acad. Sci. U. S. A.* **105**, 4191–6 (2008).
- 513 59. Brose, U. Body-mass constraints on foraging behaviour determine population and food-web dynamics.  
514 *Funct. Ecol.* **24**, 28–34 (2010).
- 515 60. Pawar, S., Dell, A. I. & Van M. Savage. Dimensionality of consumer search space drives trophic  
516 interaction strengths. *Nature* **486**, 485–489 (2012).
- 517 61. Novak, M. *et al.* Characterizing Species Interactions to Understand Press Perturbations: What Is the  
518 Community Matrix? *Annu. Rev. Ecol. Evol. Syst.* **47**, 409–432 (2016).
- 519 62. Williams, R. J. & Martinez, N. D. Success and its limits among structural models of complex food webs.  
520 *J. Anim. Ecol.* **77**, 512–519 (2008).

- 521 63. Allesina, S. *et al.* Predicting the stability of large structured food webs. *Nat. Commun.* **6**, 7842 (2015).
- 522 64. Wootton, J. T. & Emmerson, M. Measurement of Interaction Strength in Nature. *Annu. Rev. Ecol. Evol.*  
523 *Syst.* **36**, 419–444 (2005).
- 524 65. Barabás, G., Michalska-Smith, M. J. & Allesina, S. Self-regulation and the stability of large ecological  
525 networks. *Nat. Ecol. Evol.* **1**, 1870–1875 (2017).
- 526 66. Allesina, S. *et al.* Predicting the stability of large structured food webs. *Nat. Commun.* **1**, 1–52 (2015).
- 527 67. Tang, S., Pawar, S. & Allesina, S. Correlations between interaction strengths drives stability in large  
528 ecological networks - Supp Info. *Ecol. Lett.* **17**, 1094–1100 (2014).
- 529 68. Christensen, V. & Pauly, D. ECOPATH II - a software for balancing steady-state ecosystem models and  
530 calculating network characteristics. *Ecol. Modell.* **61**, 169–185 (1992).
- 531 69. de Ruiter, P. C., Neutel, A.-M. & Moore, J. C. Energetics, Patterns of Interaction Strengths, and Stability  
532 in Real Ecosystems. *Science* **269**, 1257–1260 (1995).
- 533 70. Christensen, V. *et al.* Fisheries ecosystem model of the Chesapeake Bay: Methodology,  
534 parameterization, and model exploration. *NOAA Tech. Memo* 1–146 (2009).
- 535 71. Okey, T. & Pugliese, R. in *Fisheries Impacts on North Atlantic Ecosystems: Models and Analyses* (eds.  
536 Guenette, S., Christensen, V. & Pauly, D.) 167–181 (Fisheries Center Research Reports, 2001).  
537 doi:10.14288/1.0348145
- 538 72. Arias-González, J. E., Delesalle, B., Salvat, B. & Galzin, R. Trophic functioning of the Tiahura reef sector,  
539 Moorea Island, French Polynesia. *Coral Reefs* **16**, 231–246 (1997).
- 540 73. Heymans, J. J. & Pitcher, T. J. in *Ecosystem models of Newfoundland for the time periods 1995, 1985,*  
541 *1900 and 1450.* (eds. Pitcher, T., Heymans, J. J. & Vasconcellos, M.) 5–43 (Fisheries Centre Research  
542 Reports, 2002). doi:10.14288/1.0074768
- 543 74. Walters, C. J., Christensen, V., Martell, S. J. & Kitchell, J. F. Possible ecosystem impacts of applying MSY  
544 policies from single-species assessment. *ICES J. Mar. Sci.* **62**, 558–568 (2005).
- 545
